# Supplementary material for: Visualizing back electron transfer in eosin Y photoredox catalysis
Source: Royal Society of Chemistry journal article supplement (doi:10.1039/d4cc04463k), 2024-01-01
Supplement: d4cc04463k1.pdf [file d4cc04463k1.pdf]

Supporting Information for

**Visualizing Back Electron Transfer in Eosin Y Photoredox Catalysis**

*Kai Gu,<sup>a</sup> Wenqiao Zhou,<sup>a</sup> Chunming Liu<sup>\*ab</sup>*

<sup>a</sup> School of Polymer Science and Polymer Engineering, University of Akron, Akron, OH, United States, 44325

<sup>b</sup> Department of Chemistry, University of Akron, Akron, OH, United States, 44325

\*Corresponding author: [chunmingliu@uakron.edu](mailto:chunmingliu@uakron.edu) (C.L.)

## 1. Experimental Methods

**Materials.** Diethyl 2-bromo-2-methylmalonate (DEBMM) (98%), ethyl  $\alpha$ -bromophenylacetate (EBPA) (97%), methyl  $\alpha$ -bromoisobutyrate (MBriB) ( $\geq 99\%$ ), triethylamine (TEA) ( $\geq 99.5\%$ ), 3-bromopropylamine hydrobromide (98%), 3-(triethoxysilyl) propyl isocyanate (95%), and butylamine (99.5%) were purchased from Sigma Aldrich. Eosin Y disodium salt (Eosin Y Certified, Ricca Chemical, 98.0%), and glass slides (Fisherbrand™ Economy Plain Glass Microscope Slides) were purchased from Fisher Scientific. N, N-dimethylformamide (DMF, 99.8%), diethyl ether (99%), anhydrous ethanol (EtOH, 200 proof), sodium hydroxide (NaOH) and No.1 glass coverslips (VWR® SuperSlips™ Micro Cover Glasses, Rectangular, No. 1) were purchased from VWR. Milli Q water (0.04 $\mu$ S/cm) was obtained from MilliporeSigma™ Direct-Q™ 3 water purification system.

**EY functionalization and surface immobilization.** EY-NH<sub>2</sub> was synthesized and immobilized on coverslips as previously reported.<sup>1</sup> Briefly, eosin Y disodium salt (3 mmol, 2.08 g), 3-bromopropylamine hydrobromide (4.5 mmol, 985 mg) and DMF (15 mL) were mixed in a 50 mL round bottom flask. The mixture was stirred vigorously in the dark at 80°C overnight and then quenched by immersing the flask in ice water bath. The product was obtained after precipitation in a mixture solution of diethyl ether and Milli Q water (v/v = 1:1). The EY-NH<sub>2</sub> product was collected after centrifugation and dried in vacuum for 24 hours.

Glass coverslips were cleaned by sonicating in detergent/H<sub>2</sub>O/EtOH mixture (3/92/5 wt%) for ~3 hours and then sonicated in water for 5 min, 1 M NaOH aqueous solution for 1 min, water for 5 min and dried by air blow. The cleaned coverslips were functionalized with isocyanate groups by reacting with NCO-silane vapor for 2 hours. After that, the coverslips were cleaned by sonicating in EtOH for 5 min, detergent aqueous solution (3 wt%) for 15 min, and water for 5 min and dried by air blow. The isocyanate-functionalized coverslips were immersed in the DMF solution of EY-NH<sub>2</sub> and butylamine (Bu-NH<sub>2</sub>) mixture (molar ratio 1:100) overnight. After the immobilization, the coverslips were cleaned again by sonicating in DMF for 5 min, detergent aqueous solution (3 wt%) for 15 min, and water for 5 min and dried by air blow. The EY immobilized coverslips were stored in the dark for future use.

**Single-molecule fluorescence imaging.** The imaging of EY molecules followed the same procedure as previously reported.<sup>1</sup> The EY immobilized coverslips were assembled into flow cell devices for TIRFM imaging by attaching the coverslips to glass slides using double-sided tape (Scotch double-sided tape) and sealing the coverslip edges with epoxy super glue (Devcon No. 14250). An objective-type total internal reflection fluorescence microscope (o-TIRFM), built based on an Olympus IX73 inverted microscope with TIRF objective (Olympus UAPON100XOTIRF), was used to image the EY molecules. A 2.5 mW 532 nm laser (CrystaLaser CL532-025-L filtered by Thorlabs NE03B ND filter) was used to excite the molecules on the glass surface. The photoemission of these molecules was filtered by a 542 nm longpass filter (Chroma ET542lp) and a 585/65 nm bandpass filter (Chroma ET585/65m) and collected by a sCMOS camera (Teledyne Photometrics Prime 95B). In each imaging experiment, 1000 consecutive images of the samples were taken, and the exposure time was 50 ms (frame rate: 20 fps).

## 2. Determining photobleaching rate of photobleaching EYs

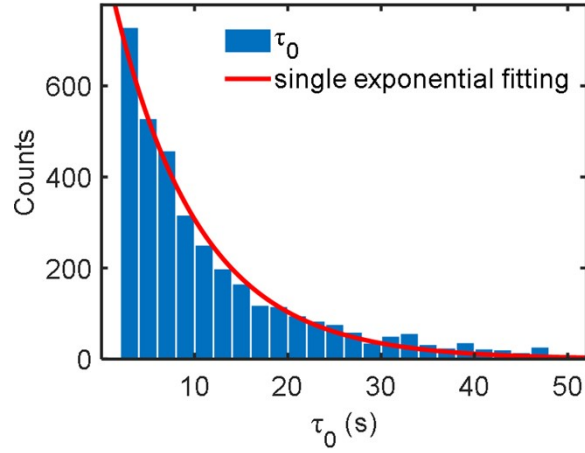

**Figure s1.** The distribution of photobleaching time  $\tau_0$  in 0.02 M DEBMM.

The distribution of photobleaching time  $\tau_0$  is fitted with single exponential decay function:

$$f(\tau_0) = A \exp\left(-\frac{\tau_0}{T_0}\right)$$

where  $A$  is prefactor,  $T_0$  is the decay constant of  $\tau_0$ . The  $T_0$  values in different conditions are summarized in the table below, all errors are fitting errors.

| <b>DEBMM</b> |            | <b>EBPA</b> |           | <b>MBriB</b> |           | <b>TEA</b> |           |
|--------------|------------|-------------|-----------|--------------|-----------|------------|-----------|
| Conc. (M)    | $T_0$ (s)  | Conc. (M)   | $T_0$ (s) | Conc. (M)    | $T_0$ (s) | Conc. (M)  | $T_0$ (s) |
| 0.01         | 10.76±0.73 | 0.001       | 9.06±0.28 | 0.1          | 8.11±0.61 | 0.005      | 5.81±0.38 |
| 0.02         | 9.19±0.79  | 0.004       | 5.27±0.22 | 0.2          | 7.59±0.24 | 0.01       | 5.40±0.27 |
| 0.04         | 6.25±0.52  | 0.006       | 4.39±0.16 | 0.4          | 5.84±0.13 | 0.02       | 4.46±0.09 |
| 0.06         | 5.24±0.16  | 0.01        | 2.81±0.06 | -            | -         | -          | -         |

### 3. Determining the decay constants of $\tau_{on}$ of photoblinking EYs

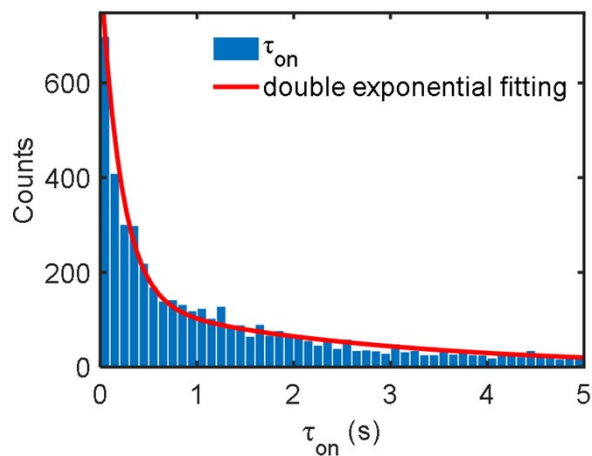

**Figure s2.** The distribution of  $\tau_{on}$  of photoblinking EYs in 0.02 M DEBMM.

The distribution of photobleaching time  $\tau_{on}$  is fitted with double exponential decay function:

$$f(\tau_{on}) = A_1 \exp\left(-\frac{\tau_{on}}{T_{on1}}\right) + A_2 \exp\left(-\frac{\tau_{on}}{T_{on2}}\right)$$

where  $A_1$  and  $A_2$  are prefactors,  $T_{on1}$  and  $T_{on2}$  are the decay constant of  $\tau_{on}$ . The  $T_{on}$  values in different conditions are summarized in the table below, all errors are fitting errors.

| <b>DEBMM</b> |               | <b>EBPA</b> |               | <b>MBriB</b> |               | <b>TEA</b> |               |
|--------------|---------------|-------------|---------------|--------------|---------------|------------|---------------|
| Conc. (M)    | $T_{on1}$ (s) | Conc. (M)   | $T_{on1}$ (s) | Conc. (M)    | $T_{on1}$ (s) | Conc. (M)  | $T_{on1}$ (s) |
| 0.01         | 0.29±0.00     | 0.001       | 0.20±0.00     | 0.1          | 0.13±0.00     | 0.005      | -             |
| 0.02         | 0.22±0.00     | 0.004       | 0.19±0.00     | 0.2          | 0.14±0.00     | 0.01       | -             |
| 0.04         | 0.19±0.00     | 0.006       | 0.17±0.00     | 0.4          | 0.14±0.00     | 0.02       | -             |
| 0.06         | 0.30±0.00     | 0.01        | 0.12±0.00     | -            | -             | -          | -             |

| <b>DEBMM</b> |               | <b>EBPA</b> |               | <b>MBriB</b> |               | <b>TEA</b> |               |
|--------------|---------------|-------------|---------------|--------------|---------------|------------|---------------|
| Conc. (M)    | $T_{on2}$ (s) | Conc. (M)   | $T_{on2}$ (s) | Conc. (M)    | $T_{on2}$ (s) | Conc. (M)  | $T_{on2}$ (s) |
| 0.01         | 3.13±0.03     | 0.001       | 2.49±0.02     | 0.1          | 2.50±0.03     | 0.005      | -             |
| 0.02         | 2.57±0.03     | 0.004       | 2.06±0.01     | 0.2          | 2.36±0.02     | 0.01       | -             |
| 0.04         | 2.32±0.01     | 0.006       | 1.81±0.01     | 0.4          | 2.07±0.01     | 0.02       | -             |
| 0.06         | 2.02±0.02     | 0.01        | 1.04±0.01     | -            | -             | -          | -             |

#### 4. Determining the decay constant of $\tau_{off}$ of photoblinking EYs

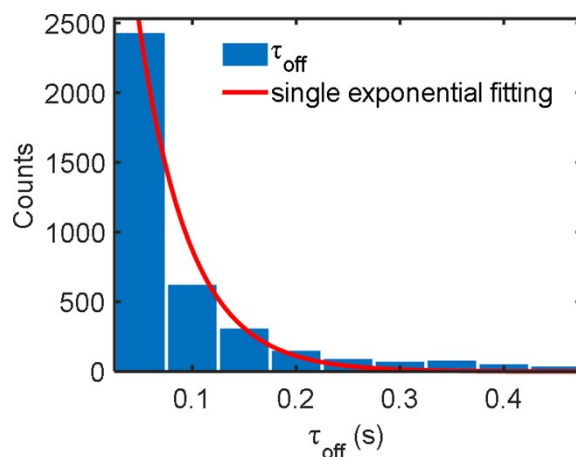

**Figure s3.** The distribution of  $\tau_{off}$  of photoblinking EYs in 0.02 M DEBMM.

The distribution of photobleaching time  $\tau_{off}$  is fitted with single exponential decay function:

$$f(\tau_{off}) = A \exp\left(-\frac{\tau_{off}}{T_{off}}\right)$$

where  $A$  is prefactor,  $T_{off}$  is the decay constant of  $\tau_{off}$ . The  $T_{off}$  values in different conditions are summarized in the table below, all errors are fitting errors.

| DEBMM     |               | EBPA      |               | MBriB     |               | TEA       |               |
|-----------|---------------|-----------|---------------|-----------|---------------|-----------|---------------|
| Conc. (M) | $T_{off}$ (s) |
| 0.01      | 0.049±0.00    | 0.001     | 0.058±0.00    | 0.1       | 0.051±0.00    | 0.005     | -             |
| 0.02      | 0.045±0.00    | 0.004     | 0.058±0.00    | 0.2       | 0.048±0.00    | 0.01      | -             |
| 0.04      | 0.046±0.00    | 0.006     | 0.061±0.00    | 0.4       | 0.049±0.00    | 0.02      | -             |
| 0.06      | 0.049±0.00    | 0.01      | 0.061±0.00    | -         | -             | -         | -             |

## 5. $P_{blink}$ values

| DEBMM     |                 | EBPA      |                 | MBriB     |                 | TEA       |                 |
|-----------|-----------------|-----------|-----------------|-----------|-----------------|-----------|-----------------|
| Conc. (M) | $P_{blink}$ (%) |
| 0.01      | 11              | 0.001     | 16              | 0.1       | 14              | 0.005     | 7               |
| 0.02      | 16              | 0.004     | 32              | 0.2       | 17              | 0.01      | 7               |
| 0.04      | 28              | 0.006     | 33              | 0.4       | 23              | 0.02      | 9               |
| 0.06      | 34              | 0.01      | 43              | -         | -               | -         | -               |

## References

1. K. Gu, S. Liu and C. Liu, *Langmuir*, 2022, **38**, 15848-15857.
